1 **The Lifestyle Factors of Physical Activity and Diet Balance associated with HPV**

2 **Infection**

3

4 Yantao Li<sup>1¶</sup>, Mengping Liu<sup>2¶</sup>, Peng Huang<sup>1\*</sup>, Zhongzhou Yang<sup>3&</sup>, Anli Wang<sup>1&</sup>

5

6 1. College of Sports Medicine and Rehabilitation, Faculty of Sport Rehabilitation,  
7 Beijing Sport University, Beijing, China

8

9 2. School of Pharmaceutical Sciences, Sun Yat-sen University, Guangzhou, China

10

11 3. Key Laboratory of Marine Drugs, School of Medicine and Pharmacy, Ocean  
12 University of China, 5 Yushan Road, Qingdao 266003, China

13

14

15 **& Corresponding author**

16 **E-mail:** [jacriyang5872@hotmail.com](mailto:jacriyang5872@hotmail.com)

17 ¶These authors contributed equally to this work.

18

## 19 **Abstract**

### 20 **Background:**

21 Human wellbeing has been linked with lifestyle factors such as physical activity, diet  
22 balance, sleep quality, depression, and anxiety. However, few studies illustrate the  
23 relationship between such lifestyle factors and HPV infection. In this study, we  
24 demonstrate that lifestyle factors might be crucial for reducing the burden of cervical  
25 cancer or HPV-related cancer.

### 26 **Participants and Methods:**

27 Participants were recruited through a digital eHealth platform without vaccination  
28 from May 2020 to August 2021. Both lifestyle factors and cervicovaginal mucus  
29 (CVM) samples to test for HPV outcomes were collected from each participant. In  
30 addition, the eHealth platform recorded age and gynecological diseases, which were  
31 adjusted to apply for both univariable and multivariable logistic regression.  
32 Furthermore, lifestyle factors and HPV serotype were categorized as low,  
33 intermediate, and high risk in order to conduct stratification analysis. Finally, lifestyle  
34 factors were studied in connection with sole and multiple HPV serotypes.

### 35 **Results:**

36 We recruited 149 HPV positive and 346 HPV negative through HPV detection.  
37 Physical activity and diet balance were significantly associated with HPV infection in  
38 lifestyle factors (P-values < 0.001) after adjusting for age and gynecological diseases.  
39 However, stratified analysis showed three factors were insignificant for HPV  
40 infection – namely, sleep quality, depression, and anxiety. Most HPV infections  
41 involved a sole HPV serotype (83%), and diet balance was the most significant  
42 difference between sole and multiple HPV infections.

43 **Conclusions:**

44 Among lifestyle factors, low physical activity or low diet balance can significantly  
45 increase HPV infection. In particular, diet balance might be related to the number of  
46 HPV serotypes. Our results suggest that exercising and regulating one's diet may  
47 reduce the burden of HPV-related cancer.

48 **Keywords:**

49 Diet balance, physical activity, eHealth Platform, HPV infection  
50

## 51 **Introduction**

52 Lifestyle behavior factors such as physical activity, diet balance, sleep quality,  
53 depression and anxiety impact personal wellness [1]. The current prevalence of  
54 physical inactivity is estimated to be 23% [2, 3]. Hence, the World Health  
55 Organization has recommended a 10% increase in physical activity by 2020 [Refs].  
56 Though epidemiological research has shown that a diet balance is associated with  
57 decreasing cancer mortality [4, 5], related randomized controlled trials (RCT) for diet  
58 balance have not unveiled any demonstrative associations [1]. This obvious paradox  
59 has led to increased targeting of diet balance patterns as a risk factor. In addition,  
60 three other risk factors that indicate a plausibly precancerous condition are sleep  
61 quality and psychosocial variables such as depression and anxiety [6]. However,  
62 relatively few studies have focused on connecting these lifestyle behaviors with HPV  
63 infection or HPV persistent infections.

64  
65 HPV infection has been shown to be influenced by age, sexually transmitted diseases,  
66 and tumors. Existing studies have explored the link between HPV and four diseases  
67 including anemia [7], endocrine disease [8], metabolic disease [9, 10] and mental  
68 disorders [11]. They also cover HPV and three diseases in medical history – namely,  
69 reproductive tract infection [12, 13], tumors, and consanguinity tumors. Our study  
70 elucidates the relationship between lifestyle behavior factors and HPV infection.

71  
72 A digital eHealth platform tool was developed on May 2020 to record age, lifestyle  
73 factors through the standard questionnaires and strategies, and disease status. Physical  
74 activity was monitored through the International Physical Activity Questionnaire  
75 (IPAQ) and could be beneficial for cancer control. Diet balance, sleep quality,  
76 depression and anxiety were recorded by the Diet Balance Index (DBI), Pittsburgh  
77 Sleep Quality Index (PSQI), Patient Depression Questionnaire-9 (PDQ-9),  
78 and Generalized Anxiety Disorder 7 (GAD-7) respectively. In addition, the digital

79 eHealth platform provided information on HPV prevention courses via weekly live  
80 streaming while regularly providing advice for participants.

81

## 82 **Methods**

### 83 **Participant Recruitment and Sample Collection**

84 This study was approved by the ethics committee of the Institutional Review Board at  
85 Beijing Sports University (2021173H). From November 2021 to January 2022, study  
86 population were registered through the digital eHealth platform. Our team explained  
87 the study objectives and obtained signed informed consent from participants to collect  
88 questionnaires. Then, participants received a mailed package consisting of a nylon  
89 conical brush and graphic user instructions (SeqHPV; Beijing Genomics Institute,  
90 China). Participants were required to collect cervicovaginal mucus (CVM) samples by  
91 rotating brush and smear samples onto a Flinders Technology Associates (FTA) card.  
92 Participants were provided with a package and free express delivery to send their FTA  
93 cards to the laboratory. Personalized online guidance was offered if participants had  
94 any queries about sampling or delivery.

95

### 96 **Outcome Measures**

97 Once the samples were returned to the laboratory, each FTA card was suspended in  
98 5ml PreservCyt media in order for each self-sample to be sequenced for HPV  
99 (seqHPV) testing. These tests independently reported 16 serotypes in total, with 12  
100 high-risk HPV serotypes (hrHPV) as HPV 16, 18, 31, 33, 35, 39, 45, 51, 52, 56, 58,  
101 59 [14]; 2 intermediate risks as HPV 66 and 68 [15]; and 2 low risk HPV (lrHPV) as  
102 HPV 6 and 11 [16]. Participants received a test report online. Doctors also provided  
103 further advice to resolve any queries they had about their test.

104

105 Each lifestyle behavior had three categories of low, middle, and high risk, except for  
106 diet balance, which had an additional fourth category of extremely high risk. Physical  
107 activity was scored in three groups as low-risk (high physical activity), middle-risk  
108 (moderate physical activity), and high-risk (low physical activity) from IPAQ in  
109 Appendix 1 [17]. Diet balance was scored for Low-Bound Score (LBS) and High-  
110 Bound Score (HBS). LBS had four risk groups as low-risk -14 ~ -1, middle-risk -29 ~  
111 -14, high-risk -43 ~ -29, and extremely high-risk -72 ~ -43. HBS also had four risk  
112 groups as low-risk 1 ~ 9, middle-risk 10 ~ 18, high-risk 19 ~ 27, and extremely high-  
113 risk 27 ~ 44 (DBI in Appendix 2). Sleep quality was scored in three groups as low-  
114 risk 0 ~ 7, middle risk 7 ~ 14, and high risk 14 ~ 21 (PSQI in Appendix 3).  
115 Depression was scored in three groups as low-risk 0 ~ 9, middle risk 9 ~ 19, and high  
116 risk 19 ~ 27 (PHQ-9, 0, 9, 19, 27 in in Appendix 4). Anxiety was scored in three  
117 groups as low-risk 0 ~ 9, middle risk 9 ~ 14, and high risk 14 ~ 21 (GAD-7 in  
118 Appendix 5).

119

## 120 **Statistical Analysis**

121 Baseline demographics were reported for two groups – one HPV-positive and the  
122 other HPV-negative. For the two groups, we summarized the continuous variables of  
123 age and lifestyle scores with both mean and standard deviation. Disease statuses were  
124 summarized as categorical variables with numbers and percentages. Differences were  
125 compared using the Wilcoxon rank sum test for continuous variables [18] and the  
126 Pearson  $\chi^2$  test for categorical variables [19]. In addition, the statistical power was  
127 also calculated for lifestyle behavior factors.

128

129 In order to study the association between lifestyle behavior factors and HPV  
130 outcomes, we applied both univariable and multivariable logistic regression [20].  
131 Regression was adjusted for age and disease status. We conducted further stratified

132 analysis for different risk groups among lifestyle behavior factors. The reference  
133 group was low-risk for each lifestyle behavior factor.

134

135 To compare and assess the effect of HPV serotype, we differentiated the three risk  
136 groups for HPV infection as hrHPV (high-risk HPV), irHPV (intermediate-risk HPV)  
137 and lrHPV (low-risk HPV). We also enumerated the number of serotypes 1 ~ 4 from  
138 participants. For one serotype (sole) and 2 ~ 4 serotypes (multiple), physical activity  
139 and diet balance scores were tested by the Wilcoxon sum rank. All analysis was  
140 conducted utilizing R software (4.0.4) for the Macintosh Operating System (Mac OS).

141

## 142 **Results**

### 143 **Participant Recruitment**

144 In total, 495 participants were recruited via our digital eHealth tool with 149 HPV  
145 positive and 346 HPV negative women (Table 1). Patient features for HPV infection  
146 are elaborated in Table 1. The average age was 41.37 (SD: 7.86) for HPV positive and  
147 the average age for HPV negative was 41.56 (SD: 8.51), indicating no significant  
148 difference. Disease status was not statistically related to HPV infection. 28% of HPV  
149 positive participants and 24% of HPV negative participants had a history of  
150 reproductive tract infection. Among lifestyle behavior scores, there were statistically  
151 significant results for physical activity, diet balance, sleep quality, and depression. For  
152 physical activities (14.36 vs 12.83) and diet balance (25.44 vs 17.29), the higher  
153 scores indicate higher risk of HPV infection. They have a statistical power of 0.998  
154 and over 0.999 respectively with *P-values* < 0.01. Conversely, another three lower  
155 scores denote higher risk on sleep scores (4.38 vs 4.94), depression (1.92 vs 2.27) and  
156 anxiety (2.75 vs 2.92). However, their statistical power reduced to 0.593 and 0.330  
157 with *P-values* = 0.01.

158

### 159 **Logistic Regression for Risk Factors**

160 To evaluate the association of risk factors for HPV infection, both univariate and  
161 multivariate logistic regression were performed for one demography factor, seven  
162 disease status factors, and five lifestyle behavior factors (Table 2). For the left  
163 univariate logistic regression, physical activity significantly increased risk by 1.03  
164 (95% CI: 1.02-1.05) and diet balance by 1.02 (95% CI: 1.01-1.02). For the subsequent  
165 right multivariate logistic regression, the increase was 1.20 (95% CI: 1.10-1.33) for  
166 physical activity and 1.09 (95% CI: 1.06-1.11) for diet balance, after considering the  
167 co-relationship with lifestyle behavior.



## 168 **Lifestyle Behavior Factors**

169 As expected, patients with high risk in physical activities were more likely to be  
170 infected with HPV in comparison to participants with low risk. This association was  
171 significant for p-value < 0.01. Patients with middle risk had a higher likelihood of  
172 being infected when compared with the low-level risk group (Table 3). Participants  
173 with middle, high, and extremely high-level diet imbalance had a higher possibility of  
174 being infected compared to participants with a low-risk diet balance. The middle level  
175 was significantly different. However, high-level and extremely high-level risk  
176 demonstrated no significant association between nutrition and HPV infection (Table  
177 3). Another three lifestyle behavior factors were also tested: sleep quality risk,  
178 depression risk, and anxiety risk. However, they were not statistically significant.  
179 Although the probability of HPV infection increased with the risk of sleep quality and  
180 depression, the high-level risk of anxiety saw fewer HPV infections (Table 3).

181

## 182 **Physical Activity and Nutrition among HPV Serotypes**

183 The prevalence of proportions involved 80.66% hrHPVs, 13.81% intermediate HPVs  
184 and 5.52% lrHPVs (Fig 1a). HPV 52 had the largest prevalence (19.89%) from the  
185 hrHPVs, followed by HPV16 (11.05%), then HPV 51 (9.39%). HPV 18 prevalence  
186 accounted for 4.42%. For intermediate HPV, HPV68 was more common than HPV66.  
187 However, the proportion was the same for lrHPVs, HPV 11 and HPV 6. More than  
188 80% of HPV infections involved one serotype (Fig 1b). We then plotted a bar chart of  
189 two groups with mean and SD for physical activity (Fig 1c). A similar chart was  
190 plotted for diet balance and the significance was denoted as P-value < 0.05 (Fig 1d).

191

## 192 **Discussion**

193 Most HPV risk factor studies focus on sexual factors or HIV infection in women.  
194 However, there are few cross-sectional studies that account for lifestyle risks or other  
195 gynecological infections. In our study, we surveyed 495 participants to investigate the  
196 connection between HPV infection and lifestyle behaviors as well as their  
197 gynecological disease history or current disease status. Apart from anxiety, four  
198 lifestyle factors appeared to demonstrate significant association with HPV infection:  
199 physical activity, diet balance, sleep quality, and depression. Meanwhile, current  
200 disease or disease history are not significantly correlated with HPV infection. After  
201 adjusting for age and disease status, multivariable logistic regression further showed  
202 significant association for physical activity and diet balance (P-values < 0.0001). In  
203 addition, there were 12 high-risk HPV (hrHPV) serotypes, more than the 2  
204 intermediate-risk and 2 low-risk serotypes.

205

206 Our statistical analysis shed light on the most significant lifestyle behaviors. To  
207 enhance HPV infection through physical activity, stratification analysis reported the  
208 many benefits of low-risk physical activity. Potential reasons may include a decrease  
209 in monocyte engagement in the preinvasive tumor microenvironment (TME) causing  
210 a depletion in tumor-associated macrophages (TAMs) [21, 22]; or explained by the  
211 relation between HPV and human immune system like cell immunity such as  
212 CD4/CD8 T cell [23]. In other words, we recommend women infected with HPV to  
213 undertake higher levels of physical activity. Earlier studies have suggested two  
214 possible approaches for increasing physical activity [17]. The first involves vigorous  
215 intensive activity to achieve a minimum overall physical activity of no less than 1500  
216 metabolic equivalents of task (MET) minutes for at least 3 days per week. The second  
217 involves achieving double the amount over the course of an entire week, or 3000  
218 MET minutes every seven days, through any combination of vigorous or moderate  
219 intensity activities (which can even include walking).

220

221 To further enhance HPV infection through diet balance, stratification analysis showed  
222 that high-risk diet balance created greater difficulties for clearing HPV infection (OR:  
223 3.27). This may be explained by difficulties in HPV infection being related to low  
224 levels of vitamin A or lycopene for high-risk diet balance [24, 25]; or also explained  
225 with the human immune system like cell immunity system [26]. Hence, we  
226 recommend two solutions for improving diet balance. Through our questionnaires,  
227 one way is to ensure appropriate consumption of dairy products and animal foods  
228 consisting of vitamin A through fruits (e.g., tomatoes) or vegetables in order to  
229 achieve a low-risk diet balance [27]. Beyond explanations from existing studies, the  
230 number of HPV serotypes is another potential justification. We found that diet  
231 balance scores were significantly increased among those with multiple HPV  
232 infections. Thus, the other solution implies that diet balance might be more effective  
233 for those with multiple HPV genotypes.

234

235 After adjusting for confounders, three lifestyle factors (sleep quality, depression, and  
236 anxiety) were shown to be insignificant in relation to HPV infection based on  
237 univariable and multivariable logistic regression. Furthermore, stratified analysis  
238 showed non-significant middle- and high-risk scores on sleep quality (*P-value*: 0.52 &  
239 0.80); anxiety (*P-value*: 0.40 & 0.61); and high-risk depression (*P-value*: 0.84).

240 Moreover, HPV infection does not appear to be associated with 7 gynecological  
241 diseases, whether current or in one's history, as validated by univariable (*P-value*:  
242 0.160 ~ 0.652) and multivariable logistic regression (*P-value*: 0.159 ~ 0.768) based on  
243 data collected from our eHealth platform.

244

245 Beyond lifestyle behaviors, our study also highlighted the benefits of communication  
246 via an eHealth platform. On our eHealth platform, participants actively responded to  
247 HPV advice. Through the platform, doctors provided weekly livestream training  
248 modules with advice about HPV self-sampling and cervical cancer prevention

249 courses. During these sessions, participants were informed about the objective of our  
250 study and possible health benefits. In our previous pilot study in May 2020, our team  
251 established the eHealth platform and continues to serve HPV high-risk cohorts [28].  
252 This regular training led to a high response rate from 2020 to 2021, as reflected by the  
253 growing audience size at our weekly livestream. Connecting with a wider audience  
254 has made it possible for us to plan further studies. Further ahead, we plan to enlarge  
255 the more widespread clinical variables considering the sexual factors. After that, the  
256 HPV infection model will be developed to predict the infection period through  
257 survival analysis.

258

### 259 **Strengths**

260 In our study, one strength was the age range. The age range of HPV positive  
261 participants ( $41.37 \pm 7.86$ ) was comparable with HPV negative participants ( $41.56 \pm$   
262  $8.51$ ). This age range is also the one in which women experience a high risk for HPV  
263 infection. Another strength was how the digital eHealth platform enabled participants  
264 to fill in their information electronically via their mobile phone. This substantially  
265 decreases the scope of human-made error. A third strength is how this study  
266 systematically considers the correlation between daily lifestyle behaviors and HPV  
267 infection after adjusting for the impact of age and current diseases or disease history.

268

### 269 **Weaknesses**

270 There are three limitations to our study. First, other lifestyle behavior factors might  
271 affect common HPV infection risk, such as sexual behavior, smoking, or alcohol  
272 consumption. However, our study focused on determining HPV infection factors.  
273 Other studies have shown that HPV infection factors are different from infection  
274 factors. Second, our study locations consisted of more well-off areas such as Beijing

275 and Shenzhen, where there is greater opportunity for abundant physical activity and  
276 dietary resources. A more comprehensive study would expand to other locations such  
277 as second-line cities or even the countryside in order to reduce geographical bias. To  
278 address this issue, our next formal study will focus on areas that encompass a broader  
279 scale, from less economically developed to more economically developed.

280

## 281 **Conclusions**

282 This study suggests that both physical activity and diet balance are significantly  
283 beneficial lifestyle factors to reduce HPV infection. However, the three other factors  
284 of sleep quality, depression, and anxiety are required for the further evidence to prove  
285 any association. Finally, we recommend exercising regularly and regulating one's diet  
286 balance might reduce the burden of HPV-related cancer such as cervical cancer.

287

## 288 **Contributors**

289 Yantao Li and Zhongzhou Yang designed the project and carried out this study. Anli  
290 Wang found this project. Zhongzhou Yang and Mengping Liu analyzed the data and  
291 prepared the manuscript. Yantao Li collected the dataset and Anli Wang helped to  
292 obtain approval from the relevant ethics committees. Yantao Li, Mengping Liu and  
293 Anli Wang helped to further improve the quality of the manuscript.

294

## 295 **Acknowledgements**

296 We acknowledge Tim Yung for English editing and the BGI team for developing the  
297 eHealth platform.

298

## 299 **References**

- 300 1. Kerr J, Anderson C, Lippman SM. Physical activity, sedentary  
301 behaviour, diet, and cancer: an update and emerging new evidence.  
302 *Lancet Oncol* 2017; 18: e457–e471.
- 303 2. Bauman AE, Kamada M, Reis RS et al. An evidence-based assessment  
304 of the impact of the Olympic Games on population levels of physical  
305 activity. *Lancet* 2021; 398: 456–464.
- 306 3. Sallis JF, Bull F, Guthold R et al. Progress in physical activity  
307 over the Olympic quadrennium. *Lancet* 2016; 388: 1325–1336.
- 308 4. George SM, Ballard-Barbash R, Manson JE et al. Comparing indices  
309 of diet quality with chronic disease mortality risk in postmenopausal  
310 women in the Women’s Health Initiative Observational Study: evidence  
311 to inform national dietary guidance. *Am J Epidemiol* 2014; 180: 616–  
312 625.
- 313 5. Harmon BE, Boushey CJ, Shvetsov YB et al. Associations of key  
314 diet-quality indexes with mortality in the Multiethnic Cohort: the  
315 Dietary Patterns Methods Project. *Am J Clin Nutr* 2015; 101: 587–597.
- 316 6. Landau C, Novak AM, Ganz AB et al. Effect of Inquiry-Based Stress  
317 Reduction on Well-being and Views on Risk-Reducing Surgery Among  
318 Women With BRCA Variants in Israel: A Randomized Clinical Trial. *JAMA*  
319 *Netw Open* 2021; 4: e2139670.
- 320 7. Ferris RL, Saba NF, Gitlitz BJ et al. Effect of Adding Motolimod  
321 to Standard Combination Chemotherapy and Cetuximab Treatment of  
322 Patients With Squamous Cell Carcinoma of the Head and Neck: The  
323 Active8 Randomized Clinical Trial. *JAMA Oncol* 2018; 4: 1583–1588.
- 324 8. Yoon D, Lee JH, Lee H, Shin JY. Association between human  
325 papillomavirus vaccination and serious adverse events in South Korean  
326 adolescent girls: nationwide cohort study. *BMJ* 2021; 372: m4931.
- 327 9. Ilhan ZE, Laniewski P, Thomas N et al. Deciphering the complex  
328 interplay between microbiota, HPV, inflammation and cancer through  
329 cervicovaginal metabolic profiling. *EBioMedicine* 2019; 44: 675–690.
- 330 10. Lee J, Kim HS, Kim K et al. Metabolic syndrome and persistent  
331 cervical human papillomavirus infection. *Gynecol Oncol* 2021; 161:  
332 559–564.
- 333 11. Sanders N, Miller B, Hernandez-Morales M, McEvoy J. Knowledge of  
334 HIV and HPV Among Women With Serious Mental Illness. *Psychiatr Serv*  
335 2020; 71: 875.
- 336 12. Kriek JM, Jaumdally SZ, Masson L et al. Female genital tract  
337 inflammation, HIV co-infection and persistent mucosal Human  
338 Papillomavirus (HPV) infections. *Virology* 2016; 493: 247–254.

- 339 13. Spurgeon ME, Uberoi A, McGregor SM et al. A Novel In Vivo  
340 Infection Model To Study Papillomavirus-Mediated Disease of the  
341 Female Reproductive Tract. *mBio* 2019; 10.
- 342 14. Bouvard V, Baan R, Straif K et al. A review of human carcinogens-  
343 -Part B: biological agents. *Lancet Oncol* 2009; 10: 321-322.
- 344 15. Cuzick J, Wheeler C. Need for expanded HPV genotyping for  
345 cervical screening. *Papillomavirus Res* 2016; 2: 112-115.
- 346 16. Dunne EF, Unger ER, Sternberg M et al. Prevalence of HPV  
347 infection among females in the United States. *JAMA* 2007; 297: 813-  
348 819.
- 349 17. Lear SA, Hu W, Rangarajan S et al. The effect of physical  
350 activity on mortality and cardiovascular disease in 130 000 people  
351 from 17 high-income, middle-income, and low-income countries: the  
352 PURE study. *Lancet* 2017; 390: 2643-2654.
- 353 18. Kumar S, Ooi CY, Werlin S et al. Risk Factors Associated With  
354 Pediatric Acute Recurrent and Chronic Pancreatitis: Lessons From  
355 INSPPIRE. *JAMA Pediatr* 2016; 170: 562-569.
- 356 19. Mahida JB, Asti L, Boss EF et al. Tracheostomy Placement in  
357 Children Younger Than 2 Years: 30-Day Outcomes Using the National  
358 Surgical Quality Improvement Program Pediatric. *JAMA Otolaryngol Head  
359 Neck Surg* 2016; 142: 241-246.
- 360 20. Zhou F, Yu T, Du R et al. Clinical course and risk factors for  
361 mortality of adult inpatients with COVID-19 in Wuhan, China: a  
362 retrospective cohort study. *Lancet* 2020; 395: 1054-1062.
- 363 21. Chang CW, Yang SF, Gordon CJ et al. Physical Activity of  $\geq 7.5$   
364 MET-h/Week Is Significantly Associated with a Decreased Risk of  
365 Cervical Neoplasia. *Healthcare (Basel)* 2020; 8.
- 366 22. Goh J, Kirk EA, Lee SX, Ladiges WC. Exercise, physical activity  
367 and breast cancer: the role of tumor-associated macrophages. *Exerc  
368 Immunol Rev* 2012; 18: 158-176.
- 369 23. Niemiro GM, Coletta AM, Agha NH et al. Salutary effects of  
370 moderate but not high intensity aerobic exercise training on the  
371 frequency of peripheral T-cells associated with immunosenescence in  
372 older women at high risk of breast cancer: a randomized controlled  
373 trial. *Immun Ageing* 2022; 19: 17.
- 374 24. Kanetsky PA, Gammon MD, Mandelblatt J et al. Dietary intake and  
375 blood levels of lycopene: association with cervical dysplasia among  
376 non-Hispanic, black women. *Nutr Cancer* 1998; 31: 31-40.
- 377 25. Moore MA, Tajima K, Anh PH et al. Grand challenges in global  
378 health and the practical prevention program? Asian focus on cancer  
379 prevention in females of the developing world. *Asian Pac J Cancer  
380 Prev* 2003; 4: 153-165.

- 381 26. Perdigon G, Valdez JC, Rachid M. Antitumour activity of yogurt:  
382 study of possible immune mechanisms. *J Dairy Res* 1998; 65: 129–138.
- 383 27. Naresh A, Hagensee M, Myers L, Cameron J. Association of Diet  
384 Quality and Dietary Components with Clinical Resolution of HPV. *Nutr*  
385 *Cancer* 2021; 73: 2579–2588.
- 386 28. Zhongzhou Yang YZ, Araceli Stubbe-Espejel, Yumei Zhao, Mengping  
387 Liu, Jianjun Li, Yanping Zhao, Guoqing Tong, Na Liu, Andrew Hutchins,  
388 Songqing Lin, Yantao Li. Vaginal microbiota and personal risk factors  
389 associated with HPV status conversion - a new approach to reduce the  
390 risk of cervical cancer? *PLoS One* 2022.
- 391



392 **Figure Legends**

393

394 **Figure 1. HPV Serotypes in Participants.**

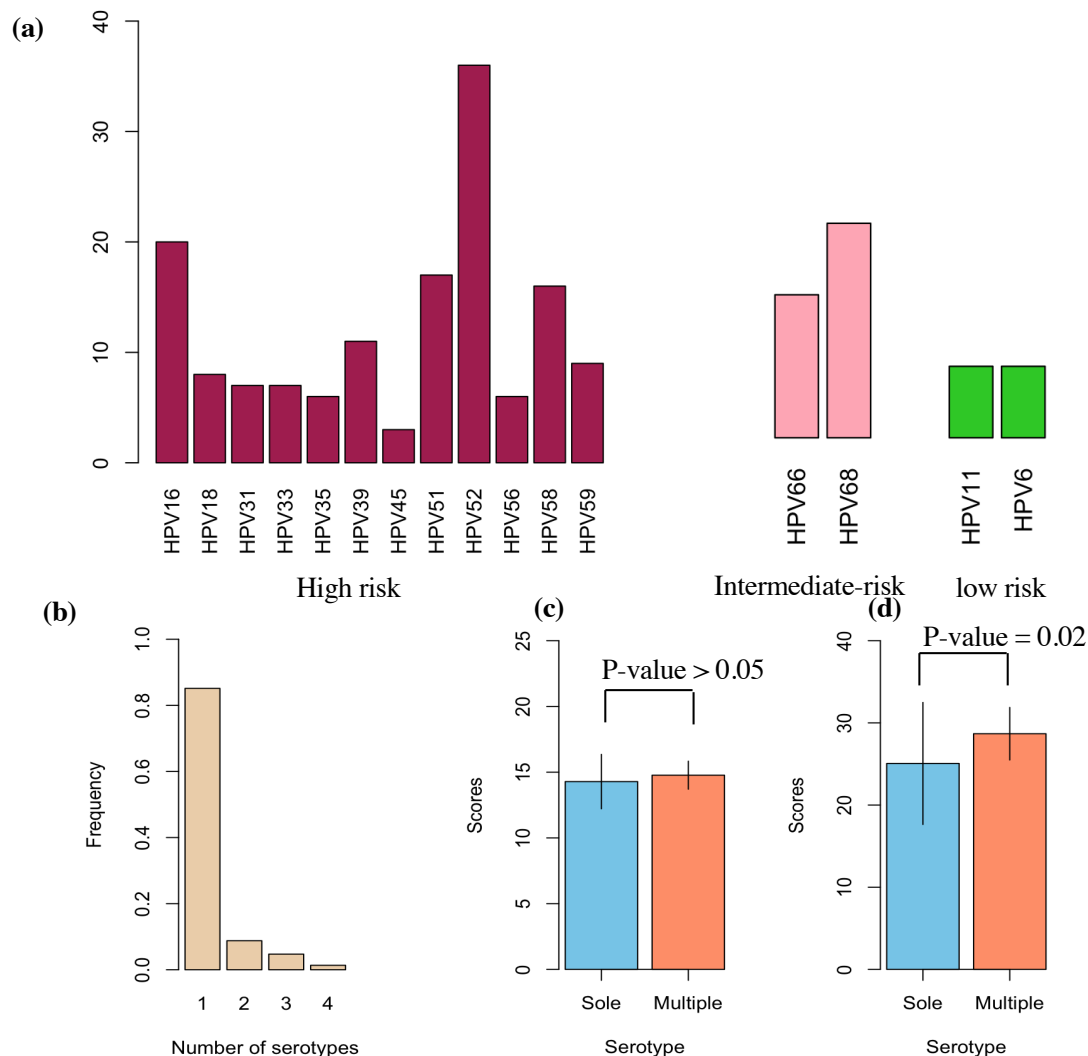

395

396 (a) Each HPV serotype's prevalence involved 12 high-risk HPV (hrHPV), 2  
 397 intermediate-risk HPV (irHPV), and 2 low-risk HPV (lrHPV). All identifiable  
 398 serotypes were denoted at the x-axis, and their proportions as percentages were  
 399 designated at the y-axis among all HPV-infected women. The left red columns  
 400 indicate the prevalence of each serotype for the 12 hrHPV; the middle pink columns  
 401 the prevalence of each serotype for the 2 irHPV; the right green columns the  
 402 prevalence of each serotype for the 2 lrHPV.  
 403 (b) This panel shows the number of serotypes identified for each patient infected with  
 404 HPV.

405 (c) Physical activity risk in two categories of data with sole and multiple serotypes in  
406 a bar chart. This plot displays the scores along with mean and SD without illustrating  
407 effect size.

408 (d) Similar bar chart as (c), but with diet balance risk.

409

410

411 **Figure 2. Transmission Cycle from Male to Female and Known/Unknown**

412 **Factors Influencing Transmission Dynamics**

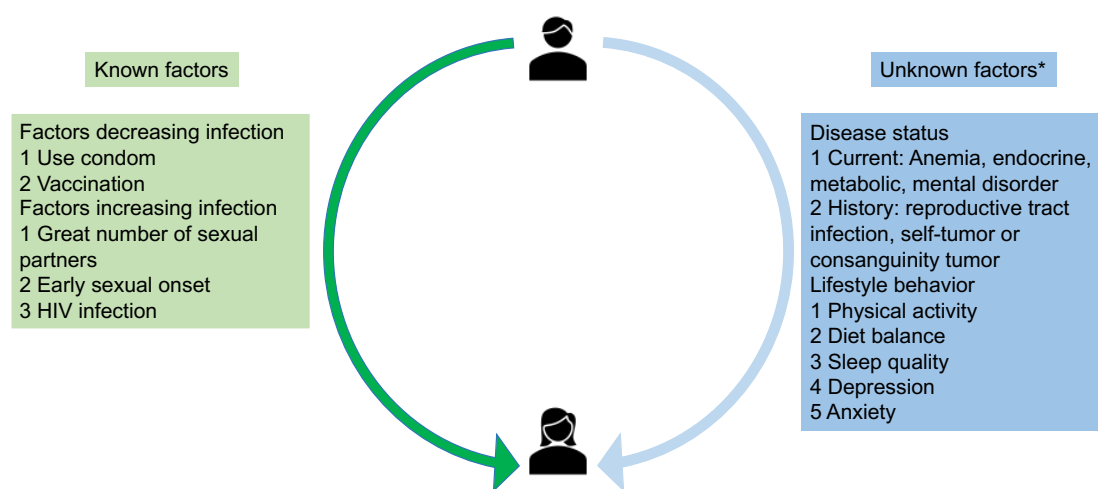

413

414 HIV, human immunodeficiency virus. \*Risk factors for the association direction was

415 unclear before the study in this figure.

416

417

418

419

420

421 **Table Legend:**

422 **Table 1. HPV Statistics for Age, Disease Status and Lifestyle Behavior**

| Risk factors                                             | HPV positive (149) | HPV negative (346) | P-values <sup>1</sup> |
|----------------------------------------------------------|--------------------|--------------------|-----------------------|
| Demography                                               |                    |                    |                       |
| Age                                                      | 41.37 ± 7.86       | 41.56 ± 8.51       | 0.29                  |
| Disease status                                           |                    |                    |                       |
| Current Anemia                                           | 21 (14.09%)        | 67 (19.36%)        | 0.16                  |
| History of reproductive tract infection                  | 42 (28.19%)        | 83 (23.99%)        | 0.32                  |
| Current endocrine disease                                | 12 (8.05%)         | 23 (6.65%)         | 0.58                  |
| Current Metabolic disease                                | 4 (2.68%)          | 12 (3.47%)         | 0.65                  |
| History of tumor disease                                 | 10 (6.71%)         | 20 (5.78%)         | 0.69                  |
| History of consanguinity tumor                           | 14 (9.40%)         | 41 (11.85%)        | 0.43                  |
| Current Mental disorder                                  | 2 (1.34%)          | 3 (0.88%)          | 0.63                  |
| Lifestyle behavior scores (Questionnaires <sup>2</sup> ) |                    |                    |                       |
| Physical activity risk <sup>3</sup> (IPAQ)               | 14.36 ± 1.95       | 12.83 ± 3.42       | <0.01###              |
| Diet balance risk <sup>3</sup> (DBI-16)                  | 25.44 ± 7.33       | 17.29 ± 10.42      | <0.01###              |
| Sleep quality scores <sup>3</sup> (PSQI)                 | 4.38 ± 3.28        | 4.94 ± 3.04        | 0.01##                |
| Depression scores <sup>3</sup> (PHQ-9)                   | 1.92 ± 3.37        | 2.27 ± 2.98        | 0.01##                |
| Anxiety scores (GAD-7)                                   | 2.75 ± 5.53        | 2.92 ± 5.18        | 0.11                  |

423

424 <sup>1</sup>: Statistical differences; ### denotes p-value < 0.01; ## denotes p-value = 0.01, #

425 denotes 0.01 < p-value < 0.05; NA = Not available. <sup>2</sup>: IPAQ = International Physical

426 Activity Questionnaires. DBI = Diet Balance Index, nutrition is negative score. PSQI

427 = Pittsburgh Sleep Quality Index. PHQ-9 = Patient Depression Questionnaire-9. GAD

428 7 = Generalized Anxiety Disorder 7. <sup>3</sup>: Power of Physical activity = 0.998; Power of

429 Diet Balance > 0.999; Power of Sleep = 0.593; Power of Depression = 0.330.

430

431 **Table 2. Multivariable Logistic Regression for All Factors**

| Risk factors                            | Univariate logistic regression |             |          | Multivariable logistic regression |             |          |
|-----------------------------------------|--------------------------------|-------------|----------|-----------------------------------|-------------|----------|
|                                         | Odds ratio                     | 95% CI      | P-values | Odds ratio                        | 95% CI      | P-values |
| Demography                              |                                |             |          |                                   |             |          |
| Age                                     | 1.00                           | 1.00 - 1.00 | 0.792    | 1.01                              | 0.99-1.04   | 0.320    |
| Disease status                          |                                |             |          |                                   |             |          |
| Current Anemia                          | 1.08                           | 0.97 - 1.20 | 0.160    | 1.48                              | 0.87 - 2.59 | 0.159    |
| History of reproductive tract infection | 0.95                           | 0.87 - 1.05 | 0.325    | 0.78                              | 0.50 - 1.23 | 0.281    |
| Current endocrine disease               | 0.96                           | 0.82 - 1.12 | 0.577    | 0.82                              | 0.40 - 1.79 | 0.613    |
| Current Metabolic disease               | 1.05                           | 0.84 - 1.33 | 0.652    | 1.61                              | 0.53 - 6.08 | 0.432    |
| History of tumor disease                | 0.97                           | 0.82 - 1.14 | 0.691    | 0.78                              | 0.35 - 1.84 | 0.555    |
| History of consanguinity tumor          | 1.05                           | 0.93 - 1.20 | 0.427    | 1.41                              | 0.75 - 2.82 | 0.302    |
| Current Mental disorder                 | 0.90                           | 0.60 - 1.36 | 0.629    | 0.76                              | 0.12 - 5.93 | 0.768    |
| Lifestyle behavior                      |                                |             |          |                                   |             |          |
| Physical activity (IPAQ)                | 1.03                           | 1.02 - 1.05 | < 0.001  | 1.20                              | 1.10 - 1.33 | < 0.001  |
| Diet balance (DBI-16)                   | 1.02                           | 1.01 - 1.02 | < 0.001  | 1.09                              | 1.06 - 1.11 | < 0.001  |
| Sleep quality (PSQI)                    | 0.99                           | 0.98 - 1.00 | 0.064    | 0.92                              | 0.83 - 1.00 | 0.06     |
| Depression (PHQ-9)                      | 0.99                           | 0.98 - 1.01 | 0.255    | 1.03                              | 0.92 - 1.15 | 0.62     |
| Anxiety (GAD-7)                         | 1.00                           | 0.99 - 1.01 | 0.751    | 0.99                              | 0.94 - 1.05 | 0.76     |

# Statistical differences, NA = Not available, the nutrition is minus scores. IPAQ = international physical activity questionnaires. DBI = diet balance index. PSQI = Pittsburgh sleep quality index. PHQ-9 = Patient Depression Questionnaire-9. GAD 7 = Generalized Anxiety Disorder 7

432

433 Legend: # Statistical differences, NA = Not available, nutrition is negative score.

434 IPAQ = International Physical Activity Questionnaires. DBI = Diet Balance Index.

435 PSQI = Pittsburgh Sleep Quality Index. PHQ-9 = Patient Depression Questionnaire-9.

436 GAD 7 = Generalized Anxiety Disorder 7

437

438

439 **Table 3. Univariable Logistic Regression: Risk of HPV Infection in Low, Middle**  
 440 **and High-Level Risk Lifestyle Behavior Factors**

| Risk factors           | HPV positive (149) | HPV negative (346) | Odds ratio | 95% CI     | P-values |
|------------------------|--------------------|--------------------|------------|------------|----------|
| Physical activity risk |                    |                    |            |            |          |
| Low                    | 3                  | 38                 | 1.00       | NA         | NA       |
| Middle                 | 13                 | 74                 | 2.14       | 0.63-10.22 | 0.22     |
| High                   | 133                | 234                | 6.85       | 2.41-29.83 | <0.01##  |
| Diet balance risk      |                    |                    |            |            |          |
| Low                    | 15                 | 163                | 1.00       | NA         | NA       |
| Middle                 | 129                | 147                | 0.11       | 0.06-0.18  | <0.01##  |
| High                   | 4                  | 28                 | 0.63       | 0.21-2.41  | 0.46     |
| Extremely high         | 1                  | 8                  | 0.66       | 0.11-17.52 | 0.78     |
| Sleep quality risk     |                    |                    |            |            |          |
| Low                    | 126                | 284                | 1.00       | NA         | NA       |
| Middle                 | 22                 | 59                 | 1.18       | 0.70-2.06  | 0.52     |
| High                   | 1                  | 3                  | 1.22       | 0.14-35.31 | 0.80     |
| Depression risk        |                    |                    |            |            |          |
| Low                    | 145                | 338                | 1.00       | NA         | NA       |
| Middle                 | 3                  | 8                  | 1.11       | 0.31-5.39  | 0.84     |
| High                   | 0                  | 0                  | NA         | NA         | NA       |
| Anxiety risk           |                    |                    |            |            |          |
| Low                    | 134                | 311                | 1.00       | NA         | NA       |
| Middle                 | 3                  | 12                 | 1.66       | 0.51-7.72  | 0.40     |
| High                   | 12                 | 23                 | 0.82       | 0.40-1.76  | 0.61     |

441 IPAQ = international physical activity questionnaires. DBI = diet balance index. PSQI = Pittsburgh sleep quality index.  
 442 PHQ-9 = Patient Depression Questionnaire-9. GAD 7 = Generalized Anxiety Disorder 7. NA = Not available

441

442 Legend: CI, Confidence Interval; NA, Not available; statistically significant  
 443 difference is marked ## for P < 0.01.
